# Supplementary material for: Functionalisation of a diene-modified hairpin mimic via the Diels–Alder reaction
Source: Royal Society of Chemistry journal article supplement (doi:10.1039/b405223d), 2004-01-01

Supplementary Information to:

**Functionalisation of Diene-Modified Hairpin Mimics *via* the *Diels-Alder* Reaction**

Rolf Tona and Robert Häner\*

Department of Chemistry and Biochemistry, University of Bern

Freiestrasse 3, CH-3012 Bern, Switzerland

(phone: +41 31 631 4382; e-mail: [robert.haener@ioc.unibe.ch](mailto:robert.haener@ioc.unibe.ch))

Figure 1 suppl.: Thermal denaturation curves of oligomers **2** and **4a-f**. Conditions: 2.5 $\mu$ M oligomers, 100mM NaCl, 10mM Tris.HCl buffer, pH 7.5.

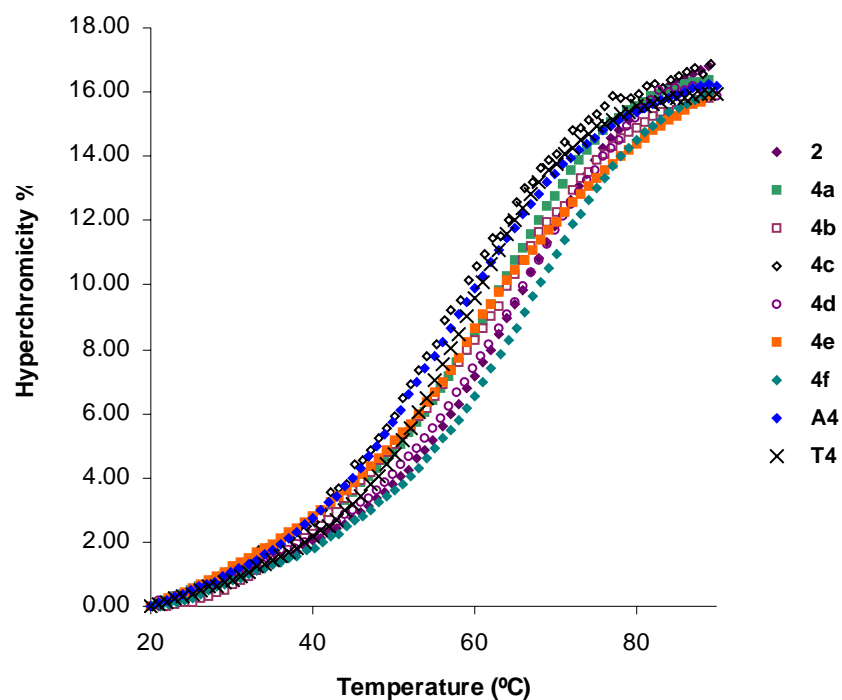

Figure 2 suppl.: Concentration dependence of  $T_m$ 's of hairpin mimics **2** and **4c**. Conditions: 0.5-5 $\mu$ M oligomers; 100mM NaCl; 10mM Tris.HCl, pH 7.5.

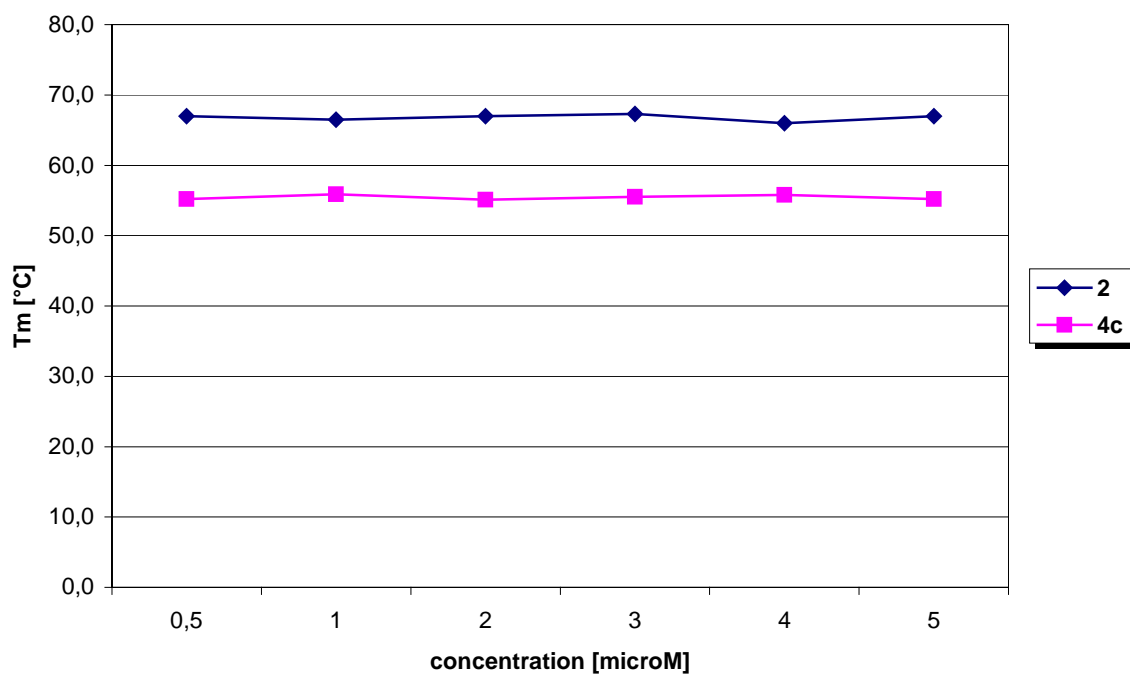

**Figure 3 suppl.:** Circular dichroism curves of hairpin mimics **2** and **4a-f**, as well as **T4** and **A4**. Conditions: 2.5 $\mu$ M oligomers; 100mM NaCl; 10mM Tris.HCl, pH 7.5.

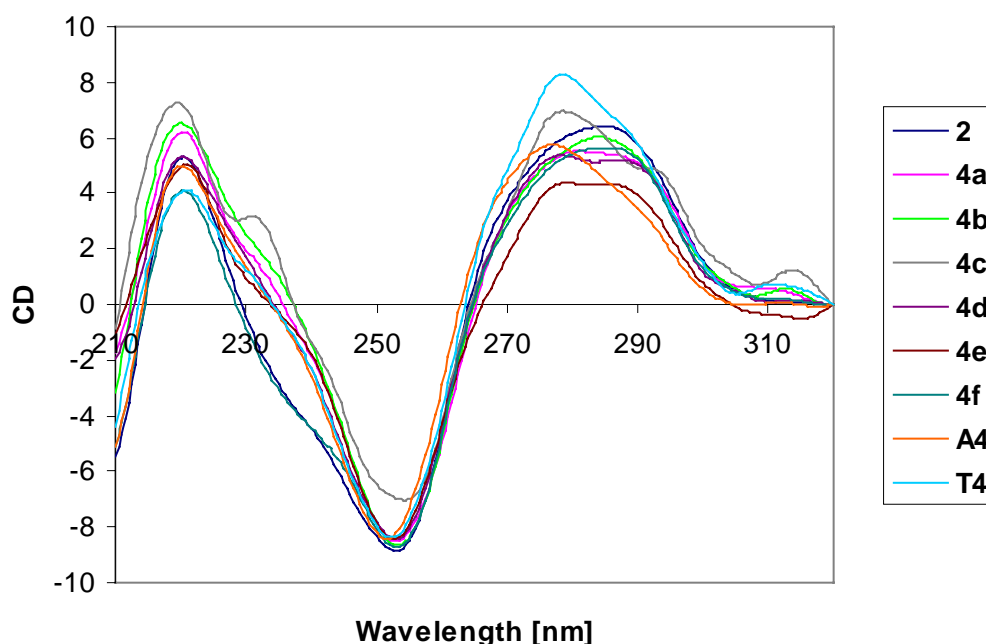

**Figure 4 suppl.:** Synthesis of phosphoramidite **1**.

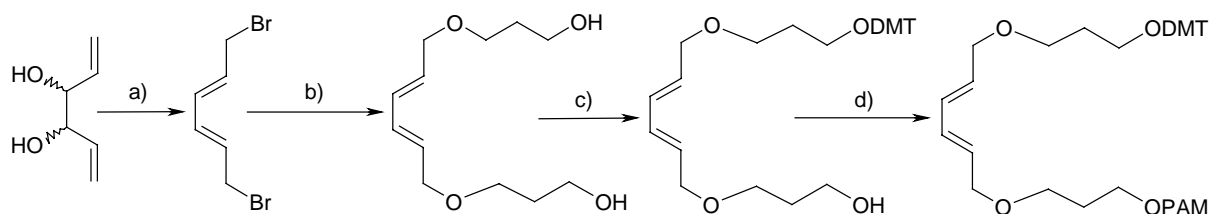

a)  $\text{PBr}_3$ , rt (81%) b)  $\text{NaOCH}_2\text{CH}_2\text{CH}_2\text{OH}$ , THF,  $50^\circ\text{C}$  (43%) c) 4,4'-dimethoxytrityl chloride, pyridine, rt (46%) d) bis(*N,N*-di-*iso*-propylamino)-2-cyanoethylphosphoramidite, di-*iso*-propylammonium tetrazolidate,  $\text{CH}_2\text{Cl}_2$ , rt (98%).

### Oligonucleotide Synthesis

Building block **1** was incorporated into oligonucleotides *via* standard automated oligonucleotide synthesis using  $\text{I}_2$ /pyridine/water in the oxidation step. Coupling yield(s) with **1** were somewhat lower than with standard phosphoramidite building blocks but always  $>80\%$ . No products arising from oxidation of the diene-moiety were observed by MS.

Figure 5 suppl.: Representative *reverse-phase* HPLC trace of a crude bioconjugate (**4f**); eluents: A: 200 mM triethylammonium acetate, B: acetonitrile, 260 nm). Bioconjugate **4f** was eluted at 56 minutes (15% B), followed by some unidentified by-products (100% B).

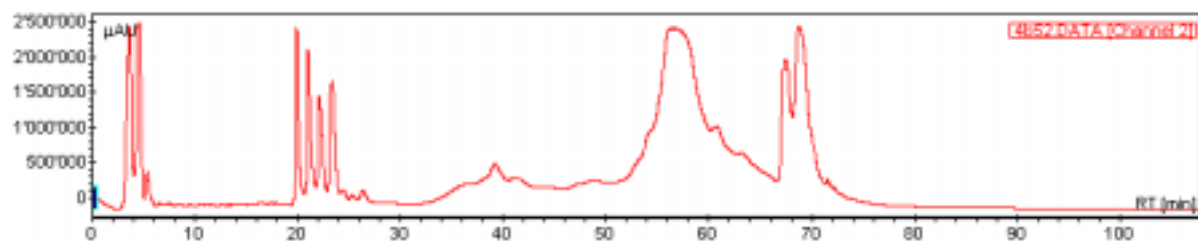

Supplement: b405223d.pdf [file b405223d.pdf]
